# Supplementary material for: Cell-Free DNA at Diagnosis for Stage IV Non-Small Cell Lung Cancer: Costs, Time to Diagnosis and Clinical Relevance
Source: MDPI journal article supplement (doi:10.3390/cancers14071783), 2022-03-31
Supplement: s1 [file s1]

## **Supplementary files**

### **Cell-free DNA at diagnosis for stage IV non-small cell lung cancer: costs, time to diagnosis and clinical relevance**

S.N. Koole<sup>1</sup>, D.C.L. Vessies<sup>2</sup>, M.M.F. Schuurbiers<sup>3</sup>, A. Kramer<sup>4</sup>, R.D. Schouten<sup>5</sup>, K. Degeling<sup>6</sup>, L.J.W. Bosch<sup>7</sup>, M.M. van den Heuvel<sup>3</sup>, W.H. van Harten<sup>1,8</sup>, D. van den Broek<sup>9</sup>, K. Monkhorst<sup>\*7</sup>, V.P. Retèl<sup>\*1,8</sup>

1. Division of Psychosocial Research and Epidemiology, The Netherlands Cancer Institute, Amsterdam, The Netherlands
2. Department of Laboratory Medicine, Netherlands Cancer Institute, Amsterdam, the Netherlands.
3. Department of Pulmonary Diseases, Radboud University Medical Centre, Nijmegen, The Netherlands
4. Department of Epidemiology and DataData Science, Amsterdam University Medical Centers (location VUmc), Amsterdam, The Netherlands
5. Department of pulmonology, The Netherlands Cancer Institute, Amsterdam, The Netherlands
6. Cancer Health Services Research, Centre for Health Policy & Centre for Cancer Research, Faculty of Medi-cine, Dentistry and Health Sciences, The University of Melbourne, Melbourne, Australia
7. Department of Pathology, Netherlands Cancer Institute, Amsterdam, The Netherlands
8. Department of Health Technology and Services Research University of Twente, Enschede The Nether-lands.
9. Department of Clinical Chemistry, The Netherlands Cancer Institute, Amsterdam, the Netherlands.

\* Correspondence: dr. V.P. Retèl, v.retél@nki.nl;



<sup>a</sup> The standard case perspective implies that an average Dutch lab practice was assumed and suppliers' standard list prices were used, in respect of all techniques.

<sup>b</sup> The cost of the platforms, software and consumables all include Value Added Taxes (21% VAT).

<sup>c</sup> For the standard diagnostic techniques, life cycles varying between 5 to 10 years, annuity factors ranging between 4,39 to 7,91, and an interest rate of 4,5 % are maintained for both types of equipment (if applicable). The annual capital costs of the additional equipment (sample preparation platform) and the sequencing platform for WGS are calculated by taking into account a life cycle of 10 and 5 years, an annuity factor of 8,11 and 4,45, respectively, and an interest rate of 4 %.

<sup>d</sup> The capital, maintenance and operational costs per sample calculations are based on 2 times sample preparation and 4 times genome sequencing (90x coverage tumor and 30x coverage blood) for WGS. For WGS application, two samples are needed (tumor biopsy and blood) to do the analysis whereas for the standard used techniques 1 sample (tumor) suffices.

<sup>e</sup> During the first year no maintenance costs occur as the platforms have a warranty for the first year.

<sup>f</sup> Software management / maintenance incorporates daily supervision and maintenance of the pipeline for WGS. It takes up 0.2 FTE (of a 40-hour working week) for a bioinformatics technician with a gross hourly salary of € 50.

<sup>g</sup> Data processing and data storage are outsourced for WGS. The cost of data processing covers the complete analysis of raw data to BAM file, VCF file and patient report. The cost of data storage is estimated based on hot storage of the BAM file, VCF file and patient report for 6 months (€ 4 per month per 200 GB).

<sup>h</sup> The sample preparation and primary data analysis is done by a laboratory technician (gross hourly salary of € 22) and bioinformatics technician (gross hourly salary of € 29) for the standard techniques. For WGS this is performed by a laboratory technician (gross hourly salary of €25). Sample and report administration is incorporated for all techniques.

<sup>i</sup> The data interpretation and report per sample is done by a clinical molecular biologist (gross hourly salary of € 41) and pathologist (gross hourly salary of € 61) for the standard techniques. For WGS this is performed by a clinical molecular biologist and a bioinformatics technician, both with a gross hourly salary of €50.

<sup>j</sup> The total cost per cancer patient represents a total cost per target gene separately for IHC (ALK, ROS1) and FISH (ALK, ROS1, RET). A combined total cost per cancer patient of the specified target genes per technique is given for Pyro seq, HRM (EGFR + KRAS + BRAF; BRAF + NRAS) and Biocartis (BRAF + NRAS)), and for Sanger (10, 3, 6, 9 amplicons) and NGS hotspot panels.

**Supplementary Table S2. Overview cost for ctDNA testing:**

|                                                                                   | <b>Personnel costs p/s</b> | <b>Material costs p/s</b> | <b>Equipment costs p/s</b> | <b>Tariff p/s</b> | <b>Total cost p/s</b> |
|-----------------------------------------------------------------------------------|----------------------------|---------------------------|----------------------------|-------------------|-----------------------|
| 1. Obtain sample in In cell-stabilizing tube                                      | € 0,00                     | € 26,14                   | € 0,00                     | € 13,70           | € 39,84               |
| 2. Transport sample                                                               | € 2,79                     | € 3,64                    | € 0,00                     |                   | € 6,43                |
| 3. Process sample                                                                 | € 11,17                    | € 3,25                    | € 0,00                     |                   | € 14,43               |
| 4. DNA isolation with QiaSymphony SP                                              | € 2,99                     | € 48,36                   | € 11,33                    |                   | € 62,68               |
| 5. ctDNA analysis with Avenio ctDNA Targeted Kit (Roche) + NextSeq 550 (Illumina) | € 29,72                    | € 878,92                  | € 46,34                    |                   | € 954,98              |
| 6. Report results                                                                 | € 9,50                     | € 0,00                    | € 0,00                     |                   | € 9,50                |
| <b>Total:</b>                                                                     | <b>€ 56,17</b>             | <b>€ 960,30</b>           | <b>€ 57,67</b>             | <b>€ 13,70</b>    | <b>€ 1.087,85</b>     |
| Failure costs                                                                     |                            |                           |                            | 0,5%              | € 5,09                |
| Overhead + facility costs                                                         |                            |                           |                            | 44%               | € 480,89              |
|                                                                                   |                            |                           |                            |                   | <b>€ 1.573,83</b>     |

Data sources used were hospital-specific tariffs, time measurements, internal invoices, published list prices, and expert input.

**Main assumptions for cost ctDNA:**

- Activity based costing method, including the costs for personnel, materials, and equipment.
- Cost price is based on analyzing 12 samples per week (in one run).
- For failure costs and overhead and facility costs we used a mark-up
  - o 44% mark-up for overhead and facility costs. We assumed that these costs covered the costs for multi-purpose equipment and all indirect costs.
  - o 0,5% failure rate (include the costs for re-performing the ctDNA analysis with the same sample for 0,5% of the samples).
- Cost for material and equipment costs includes 21% VAT.
- Equipment 33% utilization

**Supplementary Table S3. Input parameters for the model, table with mean probabilities**

|                                                                  | Mean<br>probability<br>measured<br>from trial<br>data<br>(base-case) | S.E.  | Distribution<br>type<br>(PSA) |     |    | Used in:   | Assumption<br>S.E. |
|------------------------------------------------------------------|----------------------------------------------------------------------|-------|-------------------------------|-----|----|------------|--------------------|
| <b>PLASMA</b>                                                    |                                                                      |       |                               |     |    |            |                    |
| probability that plasma retrieval succeeds*                      | 99.5%                                                                |       | -                             |     |    | Scen 2+3   |                    |
| probability of finding:                                          |                                                                      |       |                               |     |    |            |                    |
| * EGFR with cfDNA                                                | 0.063                                                                | 0.006 | Dirichlet                     |     |    | Scen 2+3   | 10%                |
| * ROS1 with cfDNA                                                | 0.005                                                                | 0.001 | Dirichlet                     |     |    | Scen 2+3   | 10%                |
| * BRAF with cfDNA                                                | 0.024                                                                | 0.002 | Dirichlet                     |     |    | Scen 2+3   | 10%                |
| * ALK with cfDNA                                                 | 0.015                                                                | 0.002 | Dirichlet                     |     |    | Scen 2+3   | 10%                |
| * METe14 with cfDNA                                              | 0.015                                                                | 0.002 | Dirichlet                     |     |    | Scen 2+3   | 10%                |
| * KRAS with cfDNA                                                | 0.344                                                                | 0.034 | Dirichlet                     |     |    | Scen 2+3   | 10%                |
| * MET with cfDNA                                                 | 0.029                                                                | 0.003 | Dirichlet                     |     |    | Scen 3     | 10%                |
| * RET with cfDNA                                                 | 0.005                                                                | 0.001 | Dirichlet                     |     |    | Scen 3     | 10%                |
| * HER2 with cfDNA                                                | 0.015                                                                | 0.002 | Dirichlet                     |     |    | Scen 3     | 10%                |
| * NRAS with cfDNA                                                | 0.010                                                                | 0.001 | Dirichlet                     |     |    | Scen 3     | 10%                |
| * rest                                                           | 0.117                                                                | 0.012 | Dirichlet                     |     |    | Scen 2+3   | 10%                |
| <b>TISSUE</b>                                                    |                                                                      |       |                               |     |    |            |                    |
| probability that a biopsy fails                                  | 15%                                                                  | 0.064 | Beta                          | 5   | 26 | Scen 1+2+3 |                    |
| probability that 2 biopsies are needed for mol.<br>Analysis      | 12%                                                                  | 0.053 | Beta                          | 4   | 32 | Scen 1+2+3 |                    |
| probability that tissue NGS succeeds after<br>successful biopsy* | 99%                                                                  | 0.005 | Beta                          | 399 | 4  | Scen 1+2+3 |                    |
| probability that a biopsy fails in scenario 3                    | 25%                                                                  | 0.094 | Beta                          | 5   | 15 | Scen 1+2+3 |                    |

|                                                                         |       |       |           |    |   |            |     |
|-------------------------------------------------------------------------|-------|-------|-----------|----|---|------------|-----|
| probability that a "simple biopsy" succeeds                             | 90%   | 0.045 | Beta      | 39 | 4 | Scen 1+2+3 |     |
| probability of finding:                                                 |       |       |           |    |   |            |     |
| - KRAS with biopsy                                                      | 0.440 | 0.044 | Dirichlet |    |   | Scen 1+3   | 10% |
| -- pdl1 high after KRAS                                                 | 0.525 | 0.053 | Dirichlet |    |   | Scen 1+3   | 10% |
| -- pdl1 low after KRAS                                                  | 0.475 | 0.048 | Dirichlet |    |   | Scen 1+3   | 10% |
| - EGFR with biopsy                                                      | 0.093 | 0.009 | Dirichlet |    |   | Scen 1+3   | 10% |
| - BRAF with biopsy                                                      | 0.033 | 0.003 | Dirichlet |    |   | Scen 1+3   | 10% |
| - ALK with biopsy                                                       | 0.032 | 0.003 | Dirichlet |    |   | Scen 1+3   | 10% |
| - ROS1 with biopsy                                                      | 0.032 | 0.003 | Dirichlet |    |   | Scen 1+3   | 10% |
| - RET with biopsy                                                       | 0.011 | 0.001 | Dirichlet |    |   | Scen 1+3   | 10% |
| - METe14 with biopsy                                                    | 0.022 | 0.002 | Dirichlet |    |   | Scen 1+3   | 10% |
| - HER2 with biopsy                                                      | 0.032 | 0.003 | Dirichlet |    |   | Scen 1+3   | 10% |
| - NRAS with biopsy                                                      | 0.097 | 0.010 | Dirichlet |    |   | Scen 1+3   | 10% |
| - WT and pdl1 high                                                      | 0.256 | 0.026 | Dirichlet |    |   | Scen 1+3   | 10% |
| * WT and pdl1 low                                                       | 0.527 | 0.053 | Dirichlet |    |   | Scen 1+3   | 10% |
| <b>TISSUE after EGFR/ROS1/BRAF/ALK/METe14 cfDNA discoverage (N=106)</b> |       |       |           |    |   |            |     |
| - EGFR with biopsy                                                      | 0.039 | 0.004 | Dirichlet |    |   | Scen 2     | 10% |
| - BRAF with biopsy                                                      | 0.010 | 0.001 | Dirichlet |    |   | Scen 2     | 10% |
| - KRAS with biopsy                                                      | 0.108 | 0.011 | Dirichlet |    |   | Scen 2     | 10% |
| -- pdl1 high after KRAS                                                 | 0.455 | 0.046 | Dirichlet |    |   | Scen 2     | 10% |
| - pdl1 low after KRAS                                                   | 0.545 | 0.055 | Dirichlet |    |   | Scen 2     | 10% |
| - ALK with biopsy                                                       | 0     | 0.000 | Dirichlet |    |   | Scen 2     | 10% |
| - ROS1 with biopsy                                                      | 0.022 | 0.002 | Dirichlet |    |   | Scen 2     | 10% |
| - RET with biopsy                                                       | 0.077 | 0.008 | Dirichlet |    |   | Scen 2     | 10% |
| - METe14 with biopsy                                                    | 0     | 0.000 | Dirichlet |    |   | Scen 2     | 10% |
| - HER2 with biopsy                                                      | 0     | 0.000 | Dirichlet |    |   | Scen 2     | 10% |
| - MET/NRAS with biopsy                                                  | 0.121 | 0.012 | Dirichlet |    |   | Scen 2     | 10% |
| - WT and pdl1h                                                          | 0.264 | 0.026 | Dirichlet |    |   | Scen 2     | 10% |

|                                             |         |         |           |       |       |            |     |
|---------------------------------------------|---------|---------|-----------|-------|-------|------------|-----|
| - WT and pdl1 low                           | 0.538   | 0.054   | Dirichlet |       |       | Scen 2     | 10% |
| <b>Means and distributions for PSA runs</b> |         |         |           |       |       |            |     |
| <b>TIME ESTIMATION*</b>                     |         |         |           |       |       |            |     |
| time for cfDNA                              | 7.5     | 0.8     | gamma     | 100.0 | 0.08  | Scen 2+3   | 10% |
| time for biopsy                             | 7       | 0.7     | gamma     | 100.0 | 0.07  | Scen 1+2+3 | 10% |
| time for tissue NGS + 3 IHC                 | 11      | 1.1     | gamma     | 100.0 | 0.11  | Scen 1+2+3 | 10% |
| time for FISH/IHC                           | 5       | 0.5     | gamma     | 100.0 | 0.05  | Scen 1+2+3 | 10% |
| time for biopsy after ctDNA-neg             | 2       | 0.2     | gamma     | 100.0 | 0.02  | Scen 2     | 10% |
| <b>COST ESTIMATION*</b>                     |         |         |           |       |       |            |     |
| tissue (biopsy)                             | € 1,000 | € 100.0 | gamma     | 100.0 | 10.00 | Scen 1+2+3 | 10% |
| blood cfDNA                                 | € 1,574 | € 157.4 | gamma     | 100.0 | 15.74 | Scen 2+3   | 10% |
| tissue preparation costs                    | € 72    | € 7.2   | gamma     | 100.0 | 0.72  | Scen 1+2+3 | 10% |
| tissue NGS                                  | € 556   | € 55.6  | gamma     | 100.0 | 5.56  | Scen 1+2+3 | 10% |
| PDL1 IHC                                    | € 156   | € 15.6  | gamma     | 100.0 | 1.56  | Scen 1+2+3 | 10% |
| PDL1 IHC + tissueprep                       | € 228   | € 22.8  | gamma     | 100.0 | 2.28  | Scen 1+2+3 | 10% |
| tissue prep + 3 IHC                         | € 384   | € 38.4  | gamma     | 100.0 | 3.84  | Scen 1+2+3 | 10% |
| FISH                                        | € 233   | € 23.3  | gamma     | 100.0 | 2.33  | Scen 1+2+3 | 10% |
| rtPCR                                       | € 100   | € 10.0  | gamma     | 100.0 | 1.00  | Scen 1+2+3 | 10% |

\*Not based on trial data. Estimated based on expert elicitations or measurements from literature (1) and the pathology department.

Abbreviations: S.E., standard error.

**Supplementary Table S4. Means and distributions for inter-patient variance in both the base case and PSA model**

|                                 | Mean<br>probability<br>measured<br>from trial data<br>(base-case) | S.E.  | Distribution<br>type<br>(base-case) | alpha | beta  | Used in:   | Assumption<br>SD |
|---------------------------------|-------------------------------------------------------------------|-------|-------------------------------------|-------|-------|------------|------------------|
| <b>TIME ESTIMATION</b>          |                                                                   |       |                                     |       |       |            |                  |
| time for cfDNA                  | 7.5                                                               | 1.3   | gamma                               | 34.6  | 0.22  | Scen 2+3   | 17%              |
| time for biopsy                 | 7                                                                 | 1.2   | gamma                               | 34.6  | 0.20  | Scen 1+2+3 | 17%              |
| time for tissue NGS + 3 IHC     | 11                                                                | 1.9   | gamma                               | 34.6  | 0.32  | Scen 1+2+3 | 17%              |
| time for FISH/IHC               | 5                                                                 | 0.9   | gamma                               | 34.6  | 0.14  | Scen 1+2+3 | 17%              |
| time for biopsy after ctDNA-neg | 2                                                                 | 0.3   | gamma                               | 34.6  | 0.06  | Scen 2     | 17%              |
| <b>COST ESTIMATION</b>          |                                                                   |       |                                     |       |       |            |                  |
| tissue (biopsy)                 | € 1,000                                                           | € 170 | gamma                               | 34.6  | 28.90 | Scen 1+2+3 | 17%              |
| blood cfDNA                     | € 1,574                                                           | € 268 | gamma                               | 34.6  | 45.49 | Scen 2+3   | 17%              |
| tissue preparation costs        | € 72                                                              | € 12  | gamma                               | 34.6  | 2.07  | Scen 1+2+3 | 17%              |
| tissue NGS                      | € 556                                                             | € 95  | gamma                               | 34.6  | 16.08 | Scen 1+2+3 | 17%              |
| PDL1 IHC                        | € 156                                                             | € 27  | gamma                               | 34.6  | 4.51  | Scen 1+2+3 | 17%              |
| PDL1 IHC + tissueprep           | € 228                                                             | € 39  | gamma                               | 34.6  | 6.59  | Scen 1+2+3 | 17%              |
| tissue prep + 3 IHC             | € 384                                                             | € 65  | gamma                               | 34.6  | 11.10 | Scen 1+2+3 | 17%              |
| FISH                            | € 233                                                             | € 40  | gamma                               | 34.6  | 6.74  | Scen 1+2+3 | 17%              |
| rtPCR                           | € 100                                                             | € 17  | gamma                               | 34.6  | 2.90  | Scen 1+2+3 | 17%              |

Abbreviations: S.E., standard error.

Supplementary Table S5. PSA outcomes: mean number of patients with 0, 1 or 2 biopsies, listed tabularly per scenario.

|                                                   | BIOPSY ALONE |     |                    |       | cfDNA at diagnosis, if EGFR, BRAF ALK,<br>ROS1: biopsy cancelled |     |                    |       | cfDNA if biopsy failed |     |                    |       |
|---------------------------------------------------|--------------|-----|--------------------|-------|------------------------------------------------------------------|-----|--------------------|-------|------------------------|-----|--------------------|-------|
|                                                   | Scenario 1   |     | 500 runs<br>95%CrI |       | Scenario 2                                                       |     | 500 runs<br>95%CrI |       | Scenario 3             |     | 500 runs<br>95%CrI |       |
|                                                   | Mean         | %   | Upper              | Lower | Mean                                                             | %   | Upper              | Lower | Mean                   |     | Upper              | Lower |
| <b>No. of biopsy attempts</b>                     |              |     |                    |       | 1235                                                             | 12% | 786                | 1684  | 0                      | 0%  | 0                  | 0     |
| 0 attempts                                        | 0            | 0%  | 0                  | 0     | 681                                                              | 7%  | 440                | 1348  | 1660                   | 17% | 1208               | 3107  |
| 1 attempt, no biopsy                              | 1525         | 15% | 1008               | 2920  | 7654                                                             | 77% | 6812               | 8422  | 8340                   | 83% | 6893               | 9467  |
| 1 biopsy                                          | 7523         | 75% | 6081               | 8843  | 430                                                              | 4%  | 117                | 921   | 0                      | 0%  | 0                  | 0     |
| 2 biopsies                                        | 951          | 10% | 300                | 2005  | 1235                                                             | 12% | 786                | 1684  | 0                      | 0%  | 0                  | 0     |
| <b>Mean number of biopsy attempts per patient</b> | <b>1.10</b>  |     |                    |       | <b>0.92</b>                                                      |     |                    |       | <b>1.00</b>            |     |                    |       |

**Supplementary Figure S1.** Cumulative mean values of cost, time and clinically relevant results, per scenario. 1 run with 20,000 cases, for determination of replications per run.

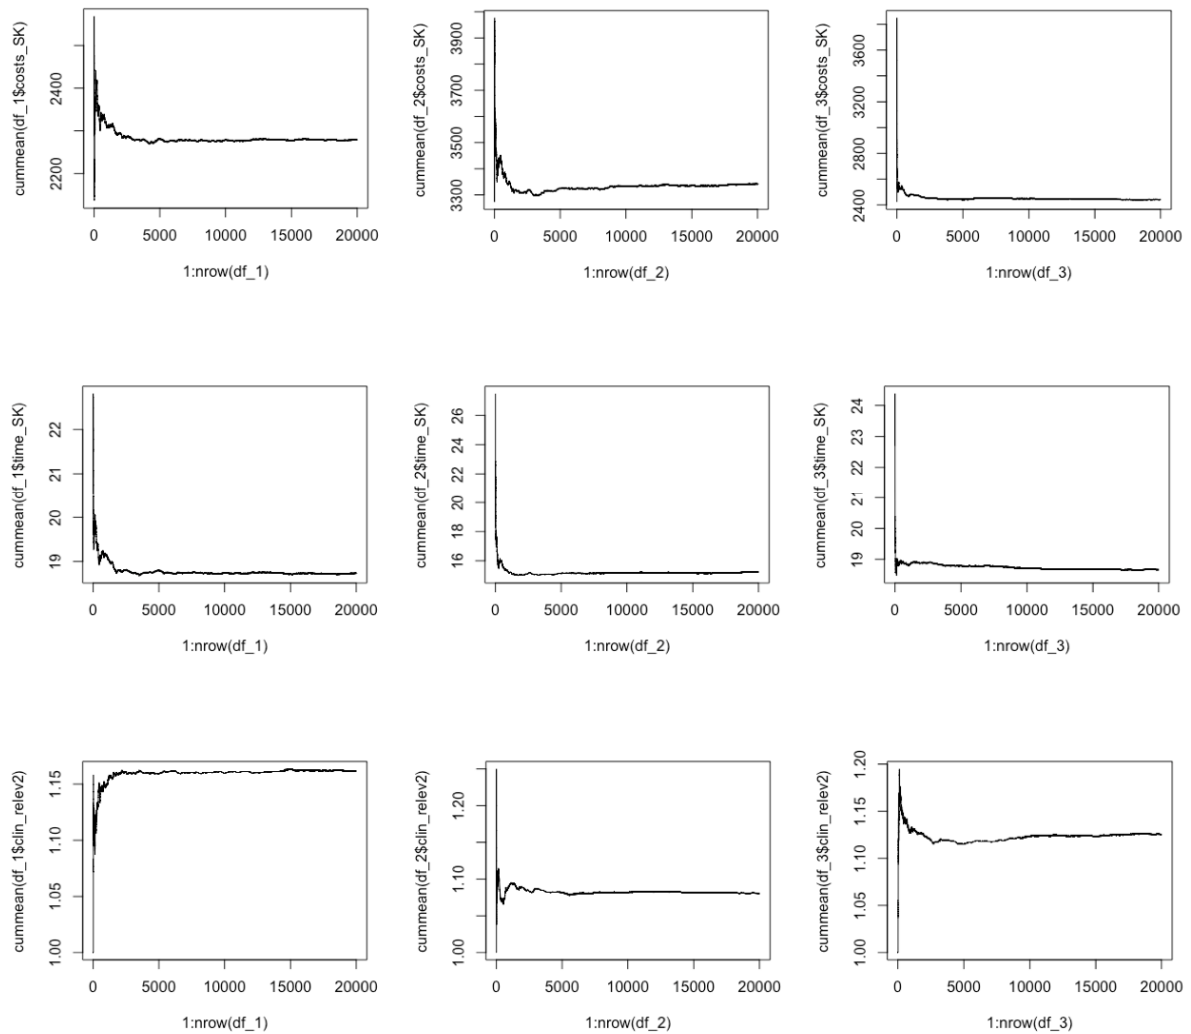

Df\_1, scenario 1; Df\_2, scenario 2; Df\_3, scenario 3; cost, mean total cost per run; time, mean total throughput time; clin\_relev2, clinically relevant test results.

**Supplementary Figure S2:** Random draw of Dirichlet distributions for outcomes of tests, as an example of the draws used in the prob. sensitivity analysis

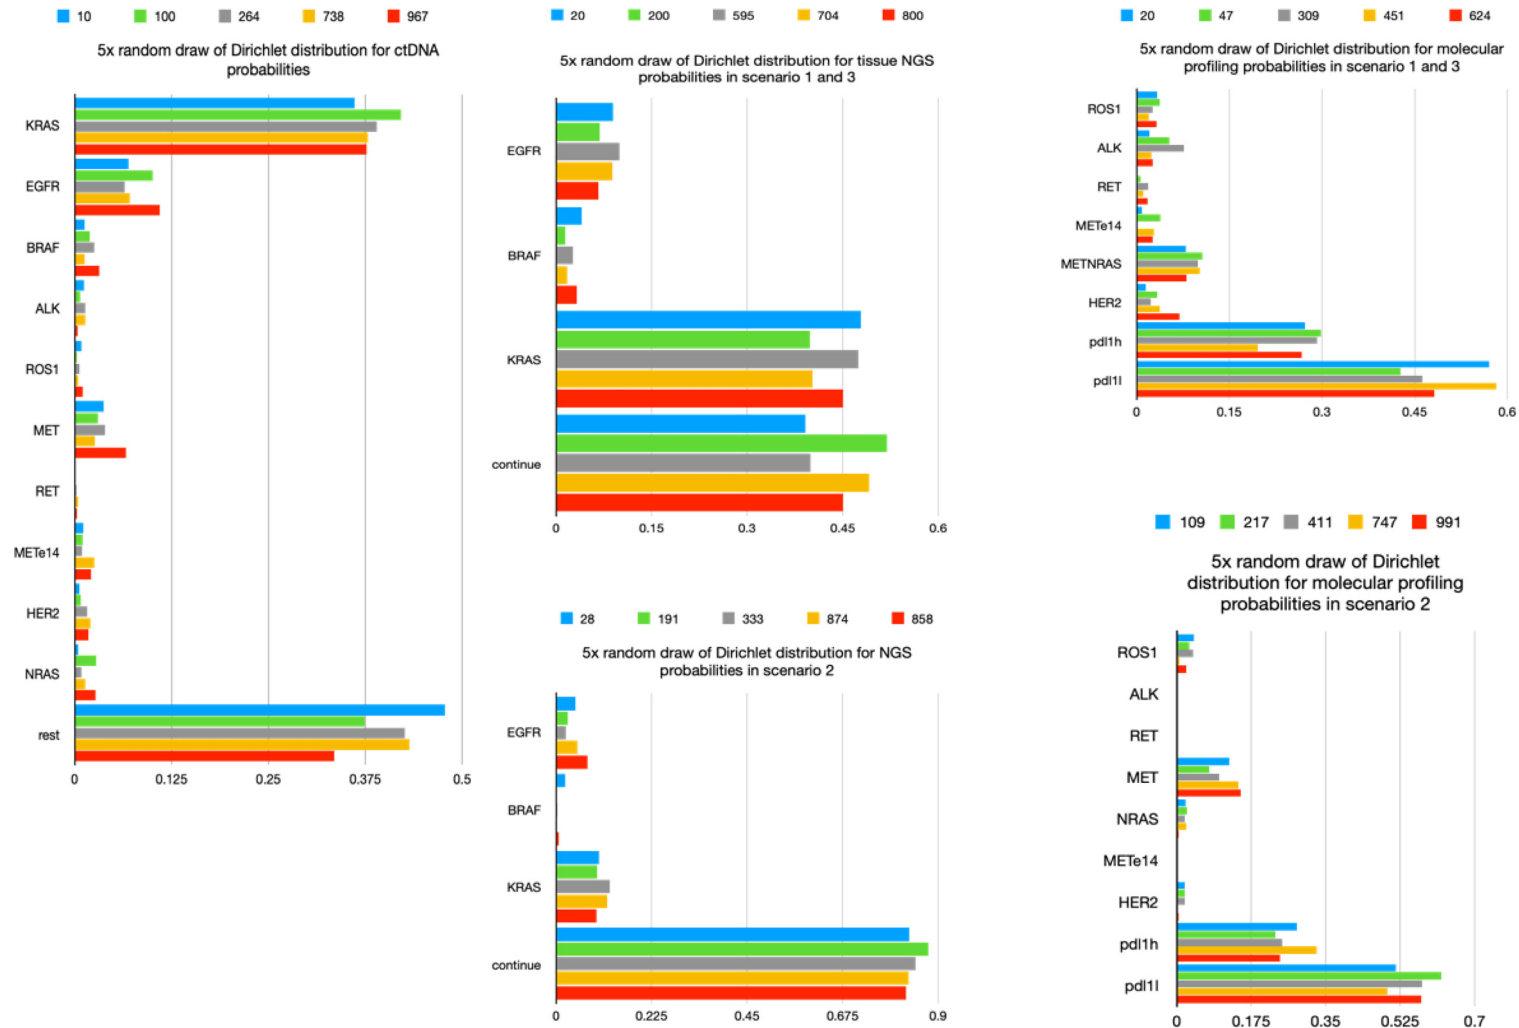

### Supplementary figure 3. PSA outcomes: mean costs per run

Mean costs per run, per scenario, plotted with means and error bars.

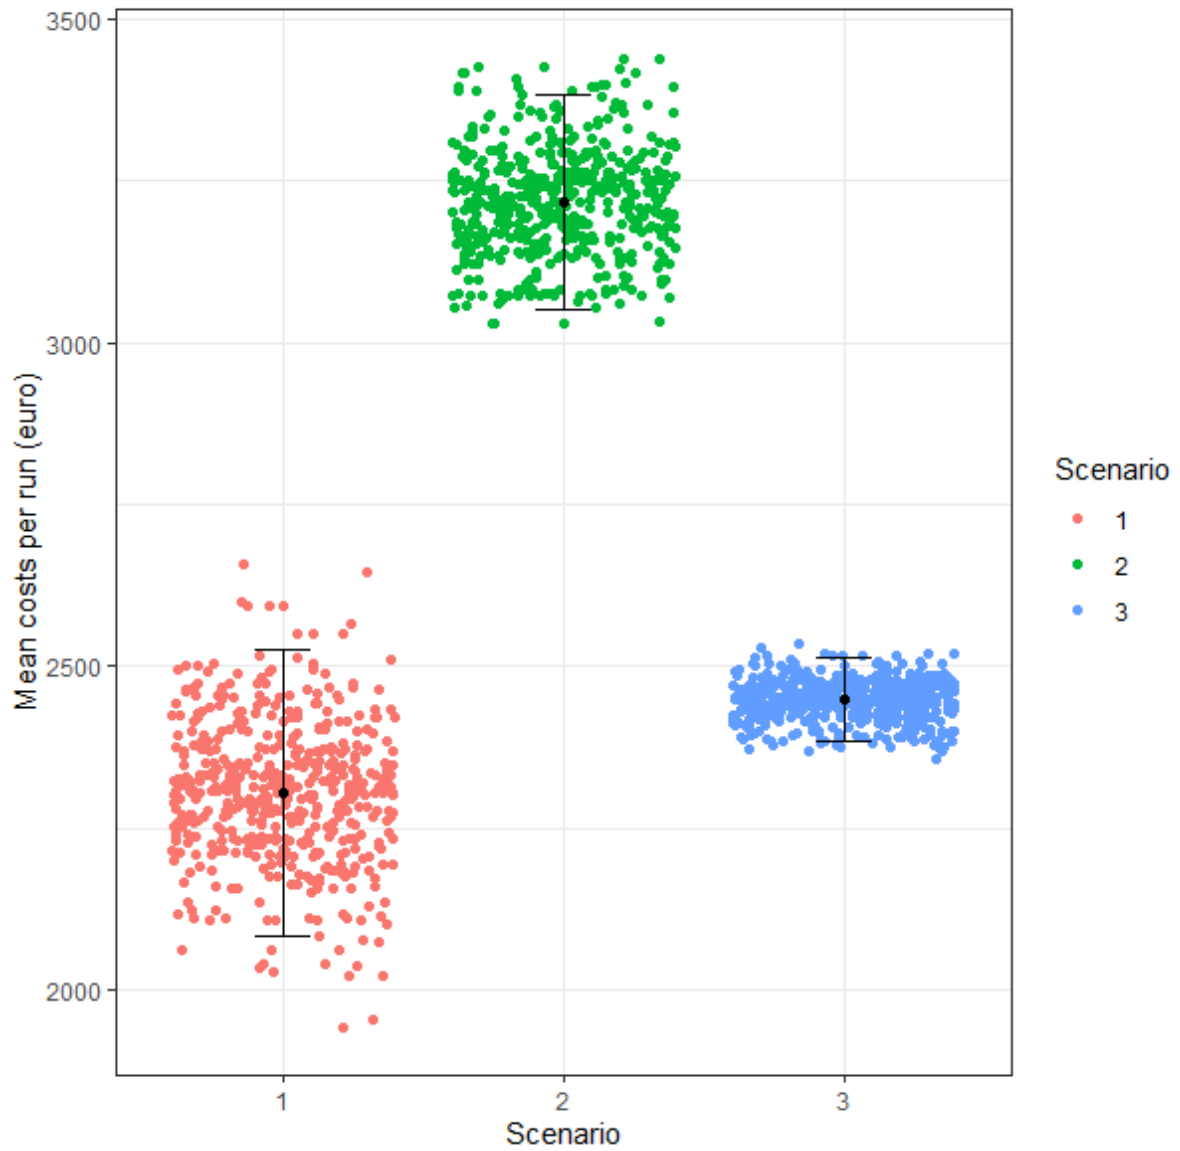

Supplementary Figure S3

# Supplementary figure 4. PSA outcomes: median time per run

Median time per run, per scenario, plotted with means and error bars.

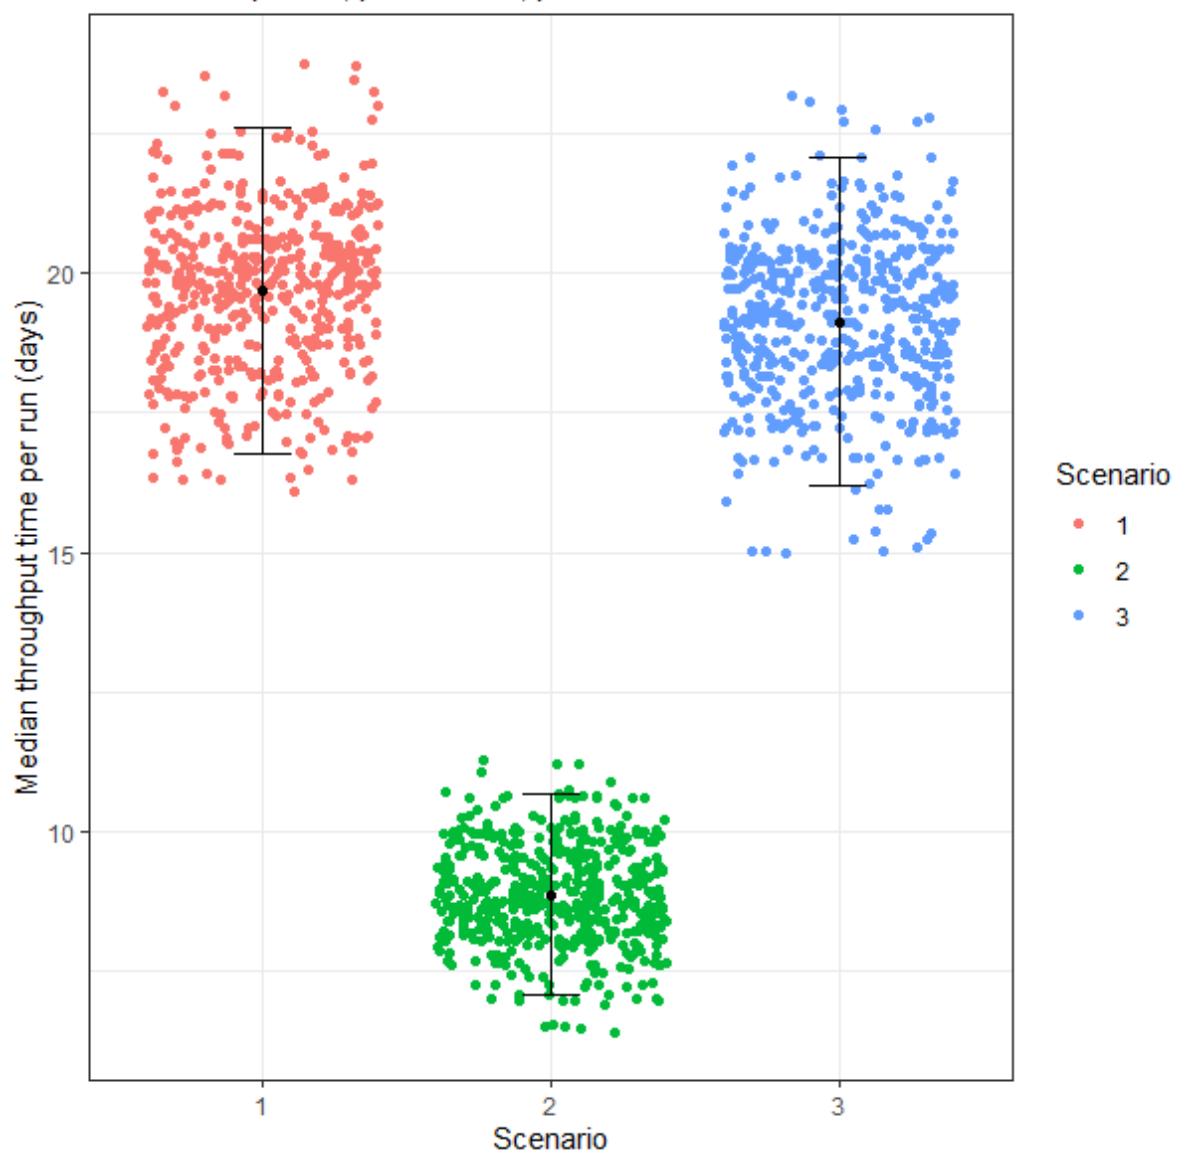

Supplementary Figure S4

Supplementary figure 5. PSA outcomes: number of clinically relevant  
Number of clinically relevant test results per run, per scenario, plotted with means a

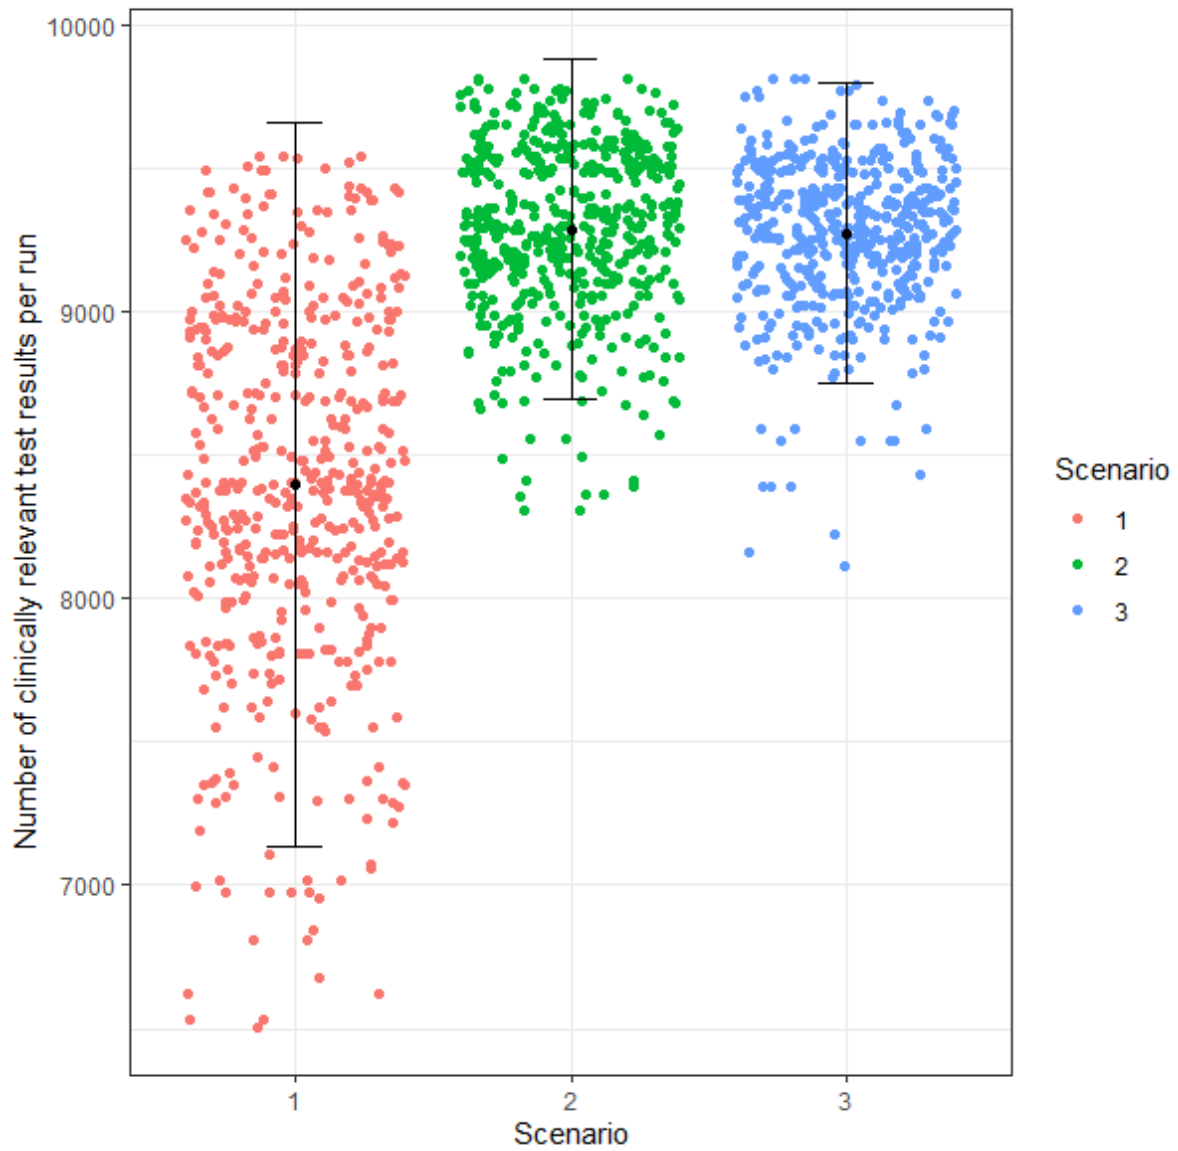

Supplementary Figure S5

**Supplementary Figure S6.** Cumulative mean values of cost, time and clinically relevant results, per scenario. Plots for 600 runs with 10.000 cases for determination of total number of runs in probabilistic sensitivity analysis

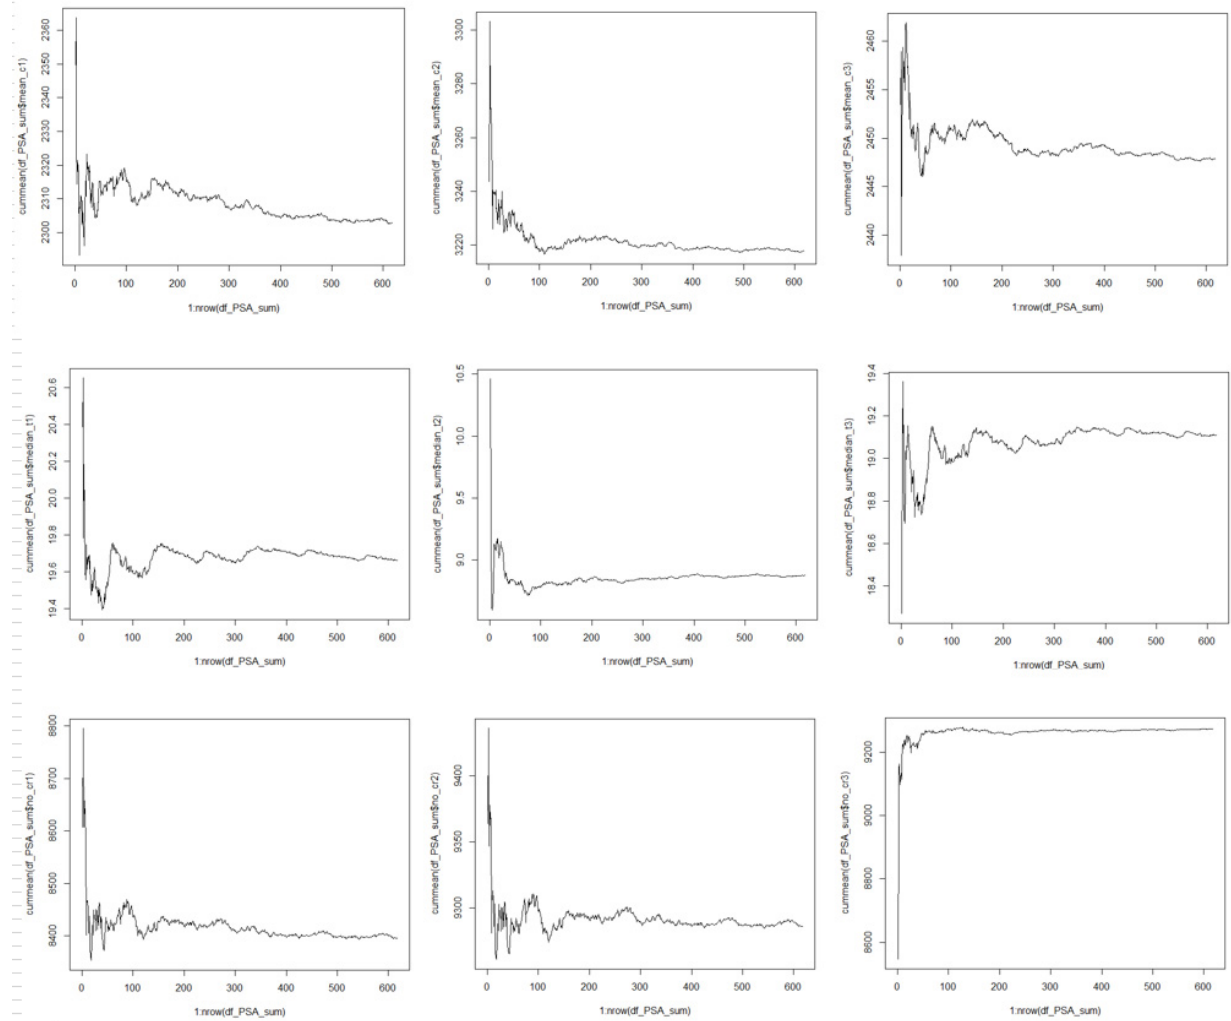

c1, cost scenario 1; c2, cost scenario 2; c3, cost scenario 3; t1, time scenario 1; t2, time scenario 2; t3, time scenario 3; cr1, clinically relevant test results scenario 1; cr2, clinically relevant test results scenario 2; cr3, clinically relevant test results scenario 3.

**Supplementary Figure S7.** Distribution of all input parameters used in the probabilistic sensitivity analysis

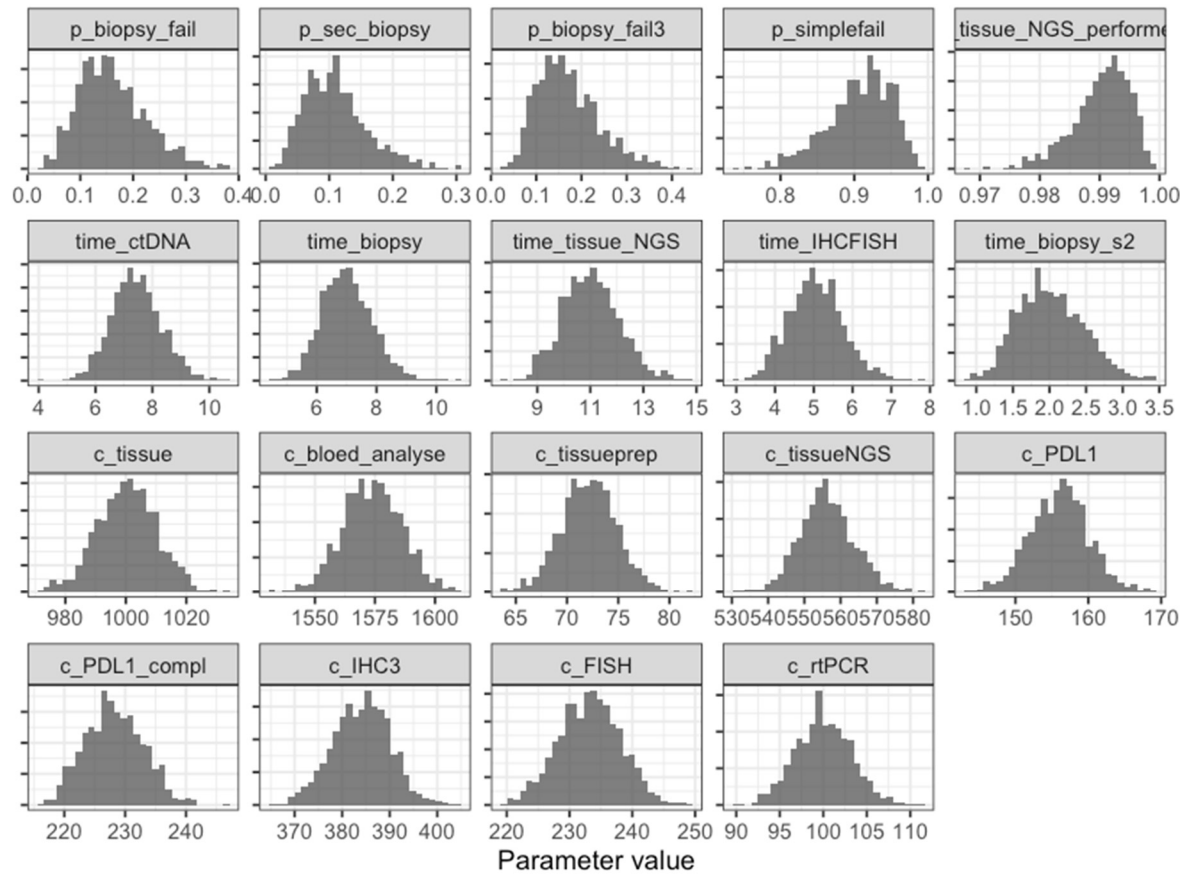

## References

1. Pasmans C.T.B.; Tops B.B.J.; Steeghs E.M.P.; Coupé V.M.H.; Grünberg K.; de Jong E.K., et al. Micro-costing diagnostics in oncology: from single-gene testing to whole- genome sequencing. *Expert Rev Pharmacoecon Outcomes Res* **2021**, 21(3):413-4.
